# Supplementary material
Source: PubMed Central journal article supplement (PMC3401417)
Supplement: NIHMS319030-supplement-1_si_001.pdf [file NIHMS319030-supplement-1_si_001.pdf]

## **SUPPORTING INFORMATION**

### **Factors Influencing the DNA Nuclease Activity of Iron, Cobalt, Nickel, and Copper Chelates**

Jeff C. Joyner,<sup>1,2</sup> Jared Reichfield,<sup>1</sup> and J. A. Cowan<sup>1,2,3\*</sup>

Contribution from <sup>1</sup> Evans Laboratory of Chemistry, Ohio State University, 100 West 18th Avenue, Columbus, Ohio 43210; <sup>2</sup> The Ohio State Biochemistry Program, 784 Biological Sciences 484 W. 12th Avenue, Columbus, Ohio 43210; and <sup>3</sup> MetalloPharm LLC, 1790 Riverstone Drive, Delaware, OH 43015

Correspondence to: Dr. J. A. Cowan, Evans Laboratory of Chemistry, Ohio State University, 100 West 18th Avenue, Columbus, Ohio 43210. tel: 614-292-2703, e-mail: [cowan@chemistry.ohio-state.edu](mailto:cowan@chemistry.ohio-state.edu)

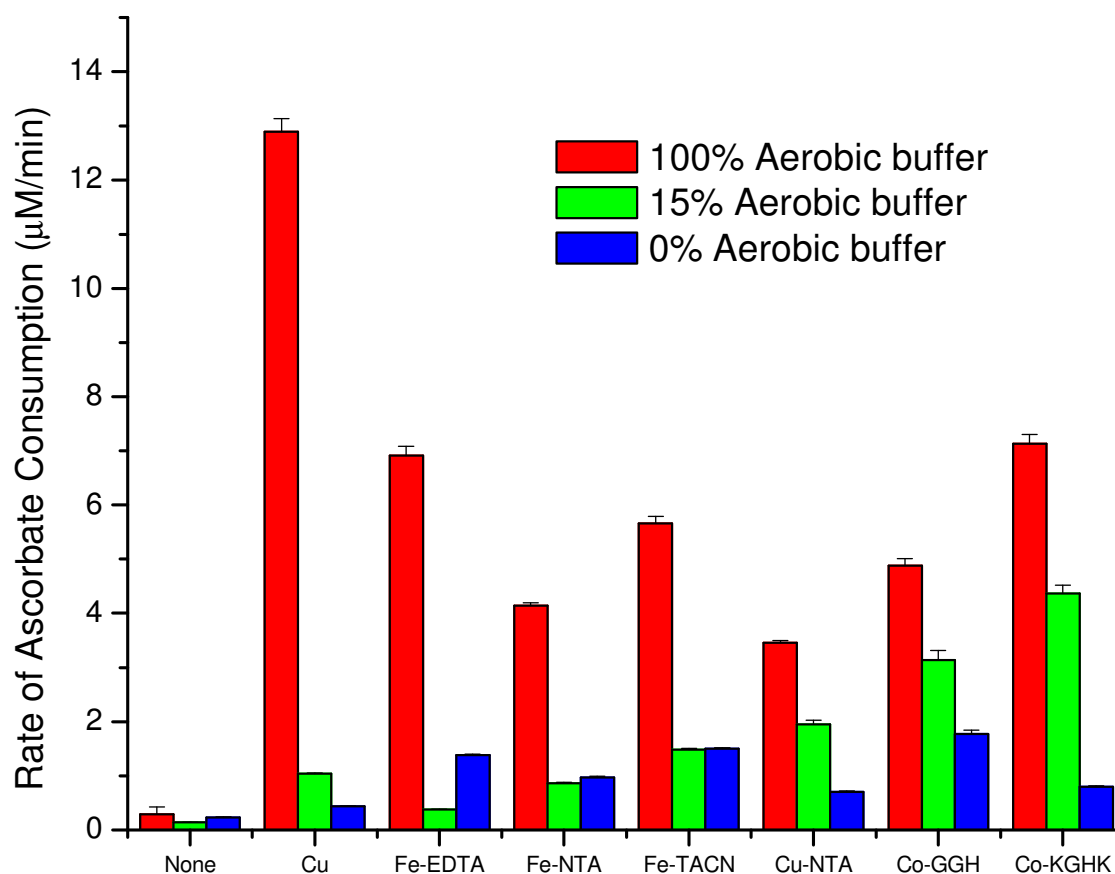

**Figure SM1.** O<sub>2</sub> requirement for ascorbate consumption for those complexes found to function aerobically in the absence of H<sub>2</sub>O<sub>2</sub>. Starting reactants included 1 mM ascorbate and 10 μM metal-chelate complex in prepared mixtures of anaerobic (degassed/Ar purged) buffer and aerobic buffer: 100% aerobic (as made), 15% aerobic (by mixing aerobic and anaerobic buffers to a 15:85 ratio within an Ar-purged vial), or ~ 0% aerobic. Rates of ascorbate consumption generally decreased as a higher percentage of purged/degassed buffer was used, consistent with the proposed O<sub>2</sub>-dependent mechanisms proposed for these metal complexes.

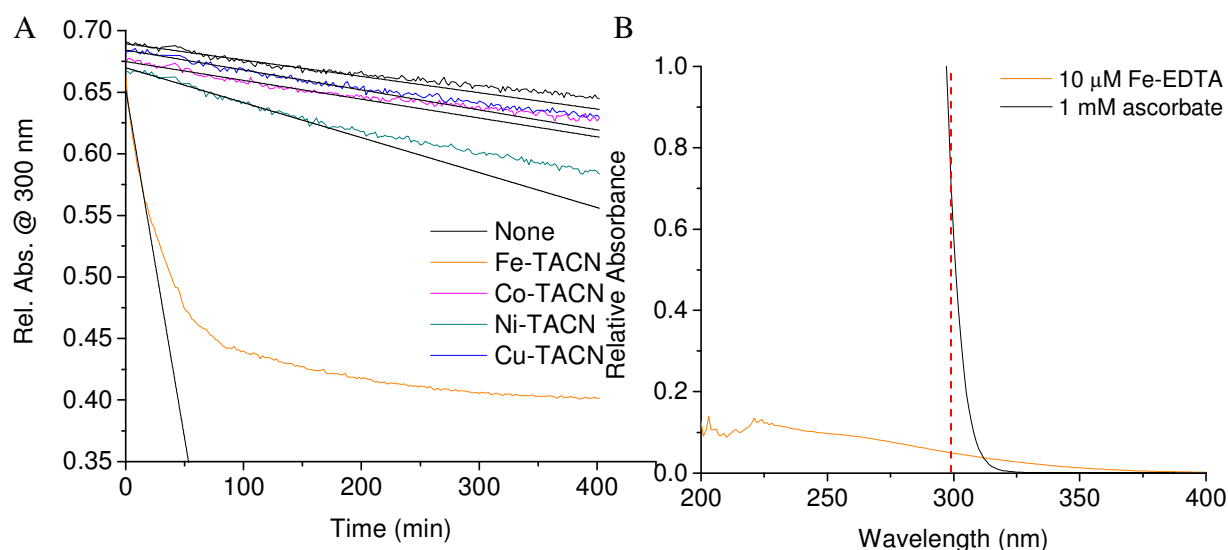

**Figure SM2.** (A) Sample trace for metal-chelate mediated multiple turnover ascorbate consumption monitored by UV/Vis absorbance. Reactions contained 10  $\mu\text{M}$  Fe(II)-triazacyclononane (or other metal-chelates), 1 mM  $\text{H}_2\text{O}_2$ , and 1 mM ascorbate in 20 mM HEPES, 100 mM NaCl, pH 7.4 on a clear 96-well plate. Initial rates of ascorbate consumption were determined after monitoring the disappearance of ascorbate at 300 nm. The absorbance from 1 mM ascorbate was  $\sim 0.68$  and from background absorbance was  $\sim 0.40$ . The extinction coefficients for ascorbate and M-chelates at 300 nm are  $\sim 590 \text{ M}^{-1}\text{cm}^{-1}$  and  $0 - 4,900 \text{ M}^{-1}\text{cm}^{-1}$ , respectively (the highest extinction coefficient at 300 nm of  $4,900 \text{ M}^{-1}\text{cm}^{-1}$  was observed for Fe-EDTA). Since the concentration of M-chelates used was 100-fold lower than that of ascorbate, the absorbance of 10  $\mu\text{M}$  M-chelate was always less than 10% of the initial absorbance of 1 mM ascorbate. Also, the relatively low absorbance of each M-chelate does not change appreciably during each experiment, especially during steady state turnover, and therefore does not affect the measured slope that occurs as a result of ascorbate consumption. (B) Wavelength scans for 1 mM ascorbate and 10  $\mu\text{M}$  Fe-EDTA, which had the highest extinction coefficient at 300 nm among the M-chelates tested, demonstrating the suitability of the ascorbate and M-chelate concentrations used in the ascorbate consumption assay (300 nm is indicated by the dashed line). Wavelength scans were performed in a quartz cuvette with 1 cm pathlength.

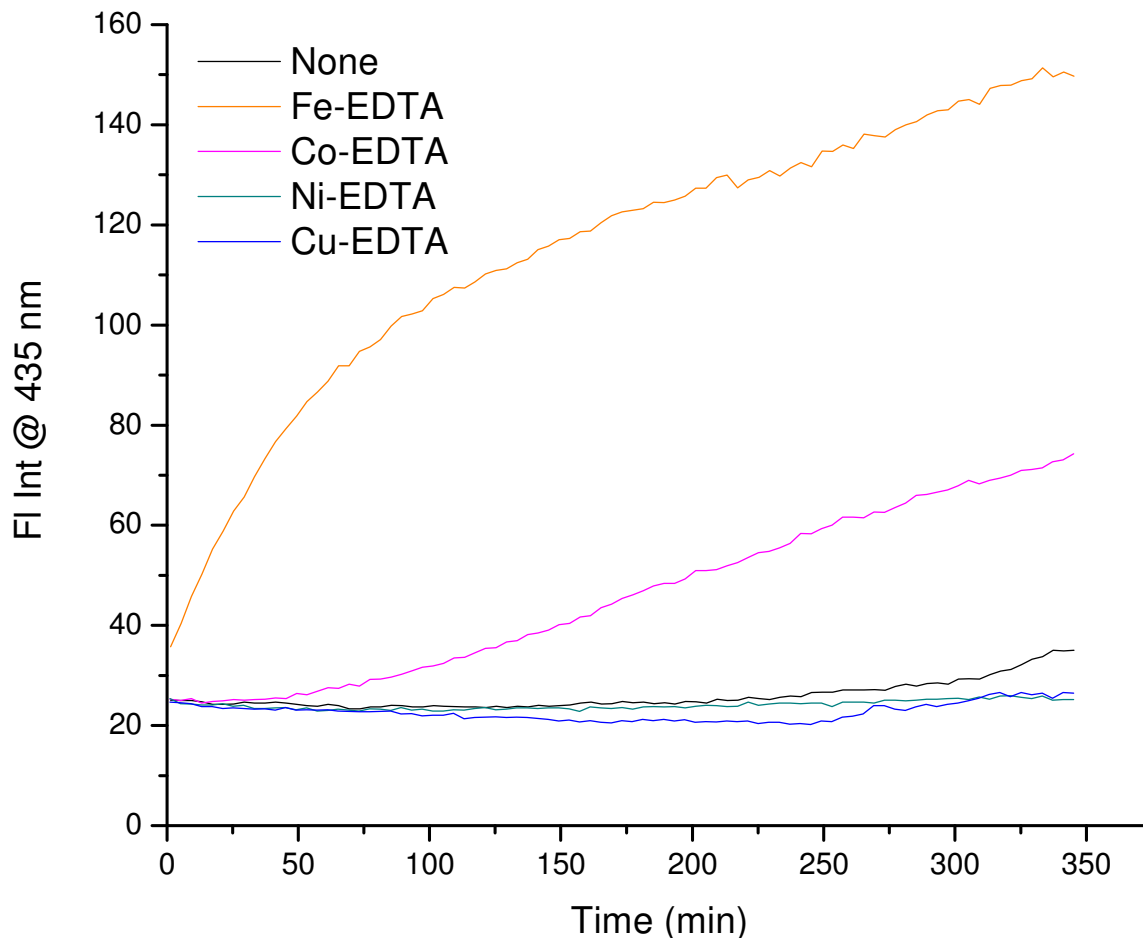

**Figure SM3.** Sample trace for metal-chelate mediated radical generation monitored by real-time fluorescence of TEMPO-9-AC. Reactions contained 10  $\mu$ M Fe-EDTA (or other metal-chelates), 10  $\mu$ M TEMPO-9-AC, and 1 mM  $\text{H}_2\text{O}_2$  in 20 mM HEPES, 100 mM NaCl, pH 7.4 on a black 96-well plate. Steady-state rates of TEMPO reaction with diffusible radicals were determined after monitoring TEMPO fluorescence at 435 nm. The emission intensity from unreacted TEMPO was  $\sim 25$  units, and for completely reacted TEMPO was  $\sim 160$  units.

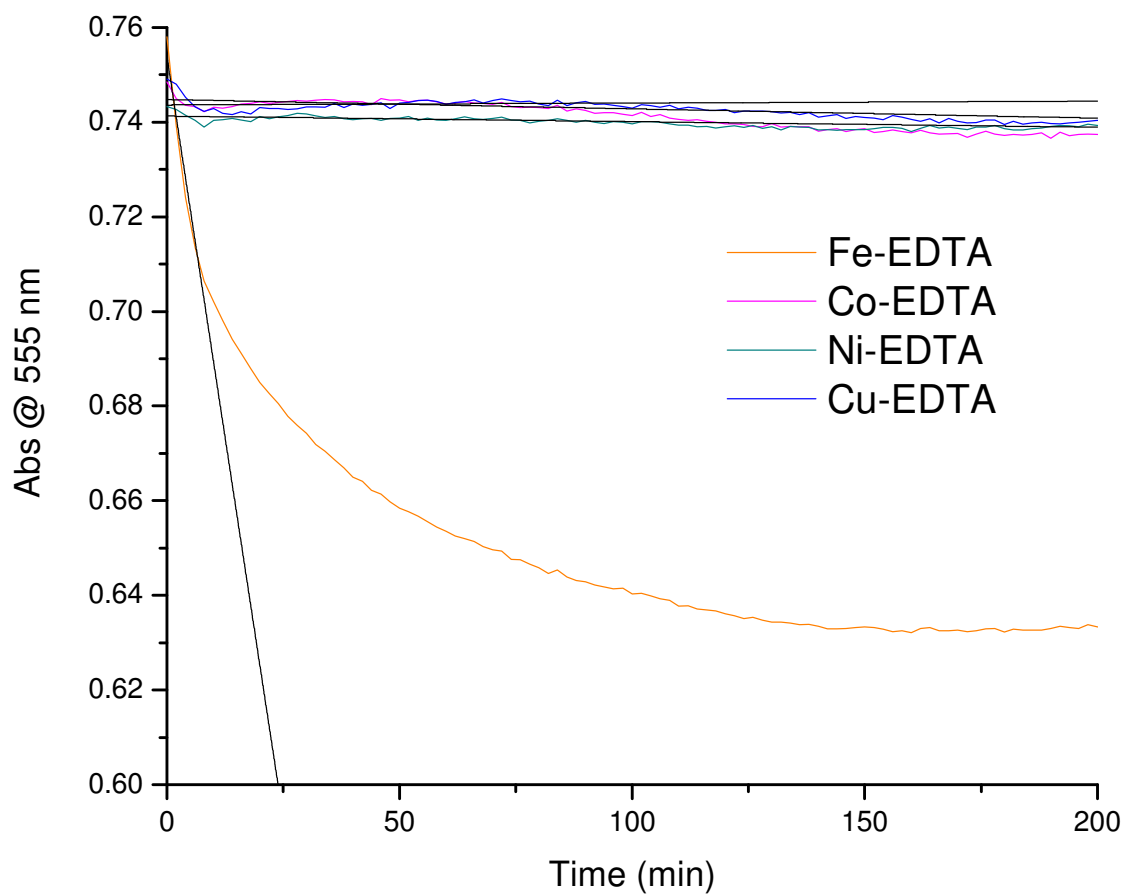

**Figure SM4.** Sample trace for metal-chelate mediated hydroxyl radical generation monitored by rhodamine B absorbance. Reactions contained 1  $\mu\text{M}$  Fe(II)-EDTA (or other metal-chelates), 10  $\mu\text{M}$  rhodamine B, 1 mM  $\text{H}_2\text{O}_2$ , and 1 mM ascorbate in 20 mM  $\text{Na}_2\text{HPO}_4$ , pH 7.4 on a clear 96-well plate. Relative absorbance was monitored at 555 nm and the absorbance from unreacted rhodamine B was  $\sim 0.74$ .

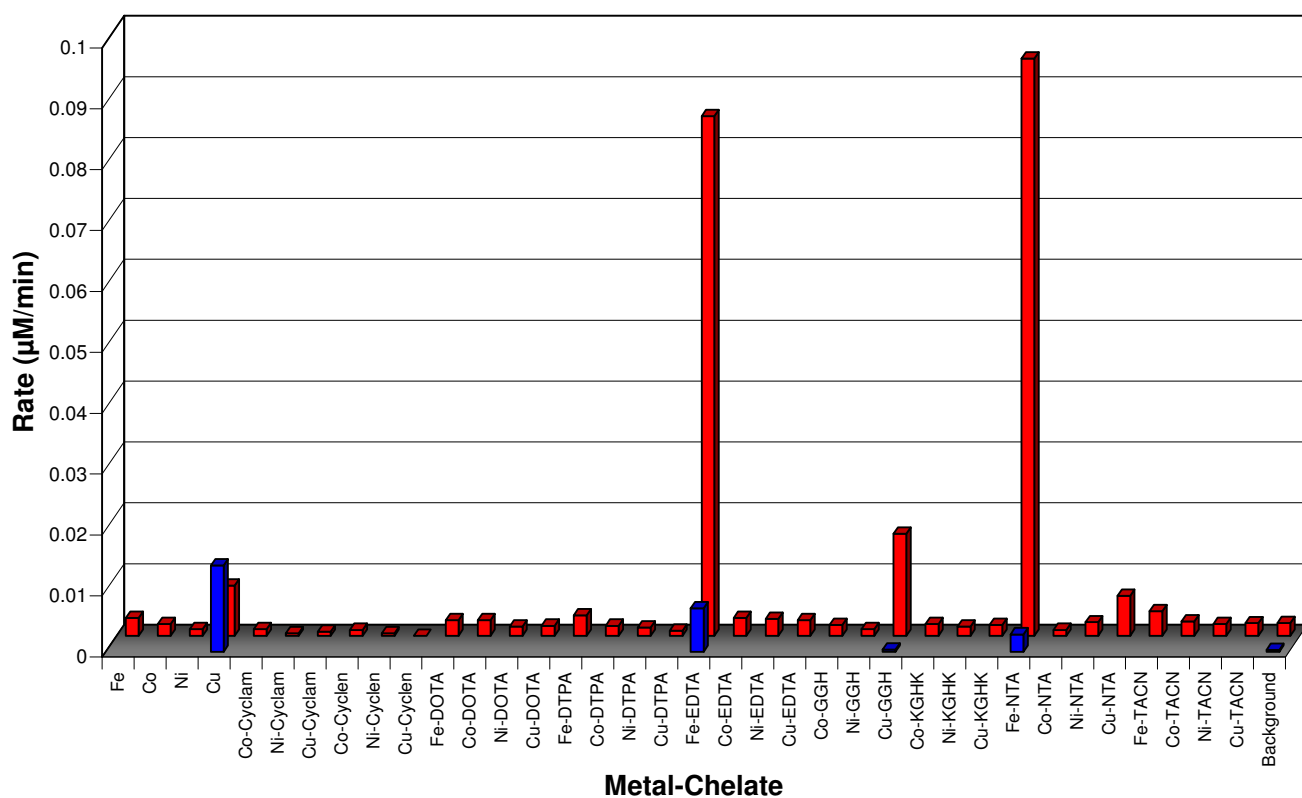

**Figure SM5.** Summary of initial rates for reaction of rhodamine B with each metal-chelate/ $O_2$  (front) and metal-chelate/ $H_2O_2$  (rear) combination.

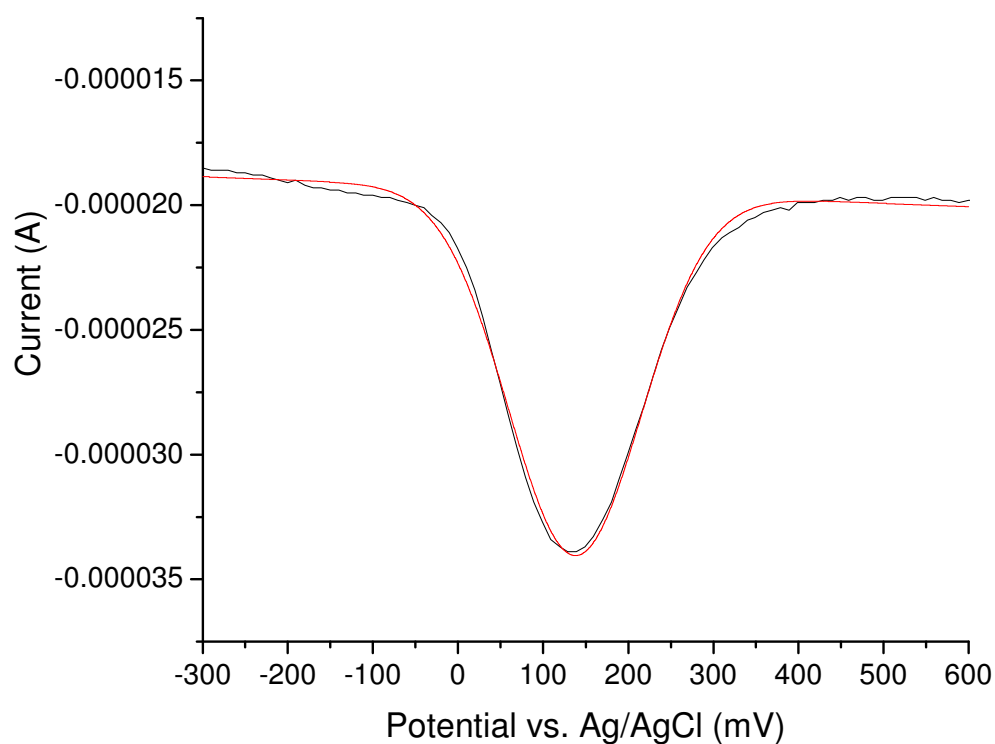

**Figure SM6.** Representative voltammogram for square wave voltammetry experiments, by which the reduction potentials of metal-chelates (Fe-DOTA shown here) were determined. Each reduction potential was determined by fitting to the Gaussian equation (6) and was later converted from potential vs. Ag/AgCl to vs. NHE. Square wave voltammetry experiments were conducted in an anaerobic solution of 20 mM HEPES, 100 mM NaCl, pH 7.4 at an ambient temperature of  $\sim 25^\circ\text{C}$ .

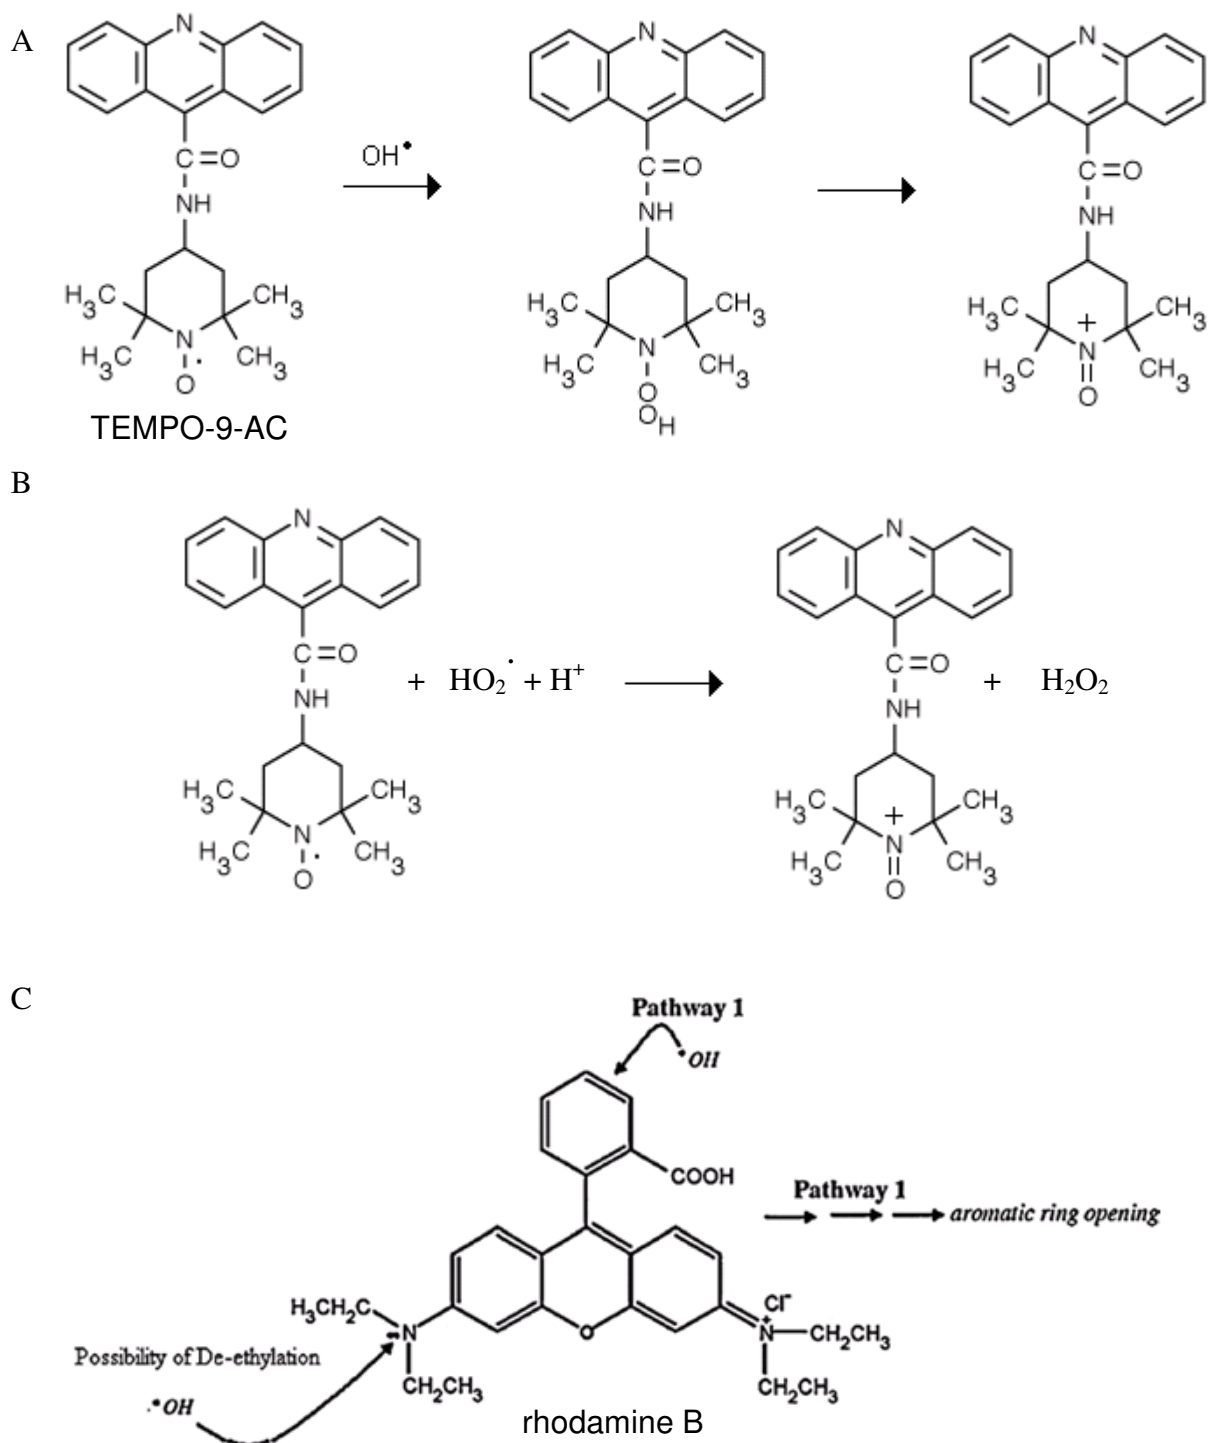

**Figure SM7.** Structures and pathways for reaction of, (A) TEMPO-9-AC with hydroxyl radical, (B) TEMPO-9-AC with superoxide,<sup>2,3</sup> and (C) rhodamine B (figure adapted from Mishra et. al. (2010)).<sup>4</sup> Hydroxyl radical and superoxide radical each react with the nitroxide radical, which quenches the fluorescence of TEMPO-9-AC. Following reaction, the fluorescence of TEMPO is restored.<sup>5</sup> Limited information is available regarding the mechanism of rhodamine B degradation by hydroxyl radical, although the most likely pathways are aromatic ring opening or de-ethylation.

| complex    | $k_{\text{nick}}$ for DNA nicking<br>( $\text{min}^{-1}$ ) | $k_{\text{lin}}$ for DNA linearization<br>( $\text{min}^{-1}$ ) |
|------------|------------------------------------------------------------|-----------------------------------------------------------------|
| Fe         | $0.05 \pm 0.01$                                            | — <sup>a</sup>                                                  |
| Co         | — <sup>a</sup>                                             | $0.0009 \pm 0.0001$                                             |
| Ni         | — <sup>a</sup>                                             | $0.0004 \pm 0.0001$                                             |
| Cu         | $0.25 \pm 0.05$                                            | $0.073 \pm 0.004$                                               |
| Co-Cyclam  | — <sup>a</sup>                                             | — <sup>a</sup>                                                  |
| Ni-Cyclam  | — <sup>a</sup>                                             | $0.0012 \pm 0.0001$                                             |
| Cu-Cyclam  | $0.053 \pm 0.004$                                          | $0.0008 \pm 0.0002$                                             |
| Co-Cyclen  | $0.017 \pm 0.003$                                          | — <sup>a</sup>                                                  |
| Ni-Cyclen  | — <sup>a</sup>                                             | — <sup>a</sup>                                                  |
| Cu-Cyclen  | $0.014 \pm 0.004$                                          | $0.0007 \pm 0.0001$                                             |
| Fe-DOTA    | — <sup>a</sup>                                             | $0.0008 \pm 0.0001$                                             |
| Co-DOTA    | — <sup>a</sup>                                             | $0.0005 \pm 0.0001$                                             |
| Ni-DOTA    | $0.030 \pm 0.007$                                          | $0.0029 \pm 0.0008$                                             |
| Cu-DOTA    | — <sup>a</sup>                                             | $0.0013 \pm 0.0001$                                             |
| Fe-DTPA    | — <sup>a</sup>                                             | $0.0012 \pm 0.0001$                                             |
| Co-DTPA    | — <sup>a</sup>                                             | — <sup>a</sup>                                                  |
| Ni-DTPA    | — <sup>a</sup>                                             | — <sup>a</sup>                                                  |
| Cu-DTPA    | — <sup>a</sup>                                             | — <sup>a</sup>                                                  |
| Fe-EDTA    | $0.044 \pm 0.009$                                          | $0.0005 \pm 0.0001$                                             |
| Co-EDTA    | $0.08 \pm 0.02$                                            | — <sup>a</sup>                                                  |
| Ni-EDTA    | $0.037 \pm 0.002$                                          | — <sup>a</sup>                                                  |
| Cu-EDTA    | $0.032 \pm 0.003$                                          | — <sup>a</sup>                                                  |
| Co-GGH     | — <sup>a</sup>                                             | — <sup>a</sup>                                                  |
| Ni-GGH     | — <sup>a</sup>                                             | — <sup>a</sup>                                                  |
| Cu-GGH     | $0.06 \pm 0.01$                                            | $0.0012 \pm 0.0002$                                             |
| Co-KG HK   | $0.014 \pm 0.002$                                          | $0.0042 \pm 0.0008$                                             |
| Ni-KG HK   | — <sup>a</sup>                                             | — <sup>a</sup>                                                  |
| Cu-KG HK   | $0.055 \pm 0.008$                                          | $0.00054 \pm 0.00004$                                           |
| Fe-NTA     | $0.05 \pm 0.01$                                            | $0.0008 \pm 0.0002$                                             |
| Co-NTA     | $0.1 \pm 0.1$                                              | $0.005 \pm 0.003$                                               |
| Ni-NTA     | — <sup>a</sup>                                             | $< 0.009$                                                       |
| Cu-NTA     | $0.148 \pm 0.007$                                          | $0.0032 \pm 0.0004$                                             |
| Fe-TACN    | $0.012 \pm 0.006$                                          | $0.0008 \pm 0.0007$                                             |
| Co-TACN    | — <sup>a</sup>                                             | — <sup>a</sup>                                                  |
| Ni-TACN    | — <sup>a</sup>                                             | — <sup>a</sup>                                                  |
| Cu-TACN    | — <sup>a</sup>                                             | — <sup>a</sup>                                                  |
| Background | $0.006 \pm 0.001$                                          | $0.00024 \pm 0.00003$                                           |

**Table SM1.** Summary of observed first-order rate constants ( $k_{\text{obs}}$ ) for consecutive DNA nicking ( $k_{\text{nick}}$ , rear) and subsequent linearization ( $k_{\text{lin}}$ , front) by each metal-chelate (as shown in Figure 1 of the manuscript). <sup>a</sup> Below detection limit. The limits of detection for nicking and linearization were 0.009 and  $0.00033 \text{ min}^{-1}$ , respectively.

| complex    | $k_{\text{nick}}$ for DNA nicking ( $\text{min}^{-1}$ ) | ascorbate consumption rate for $\text{H}_2\text{O}_2$ and $\{\text{O}_2\}$ ( $\mu\text{M}/\text{min}$ ) | TEMPO reaction rate for $\text{H}_2\text{O}_2$ and $\{\text{O}_2\}$ ( $\mu\text{M}/\text{min}$ ) | reduction potential vs. NHE (mV) | redox couple |
|------------|---------------------------------------------------------|---------------------------------------------------------------------------------------------------------|--------------------------------------------------------------------------------------------------|----------------------------------|--------------|
| Fe         | $0.05 \pm 0.01$                                         | $6.4 \pm 0.1$ {— <sup>a</sup> }                                                                         | — <sup>a</sup> {— <sup>a</sup> }                                                                 | — <sup>b</sup>                   | 3+/2+        |
| Co         | — <sup>a</sup>                                          | — <sup>a</sup> {— <sup>a</sup> }                                                                        | $0.0319 \pm 0.0009$ {— <sup>a</sup> }                                                            | — <sup>b</sup>                   | 3+/2+        |
| Ni         | — <sup>a</sup>                                          | — <sup>a</sup> {— <sup>a</sup> }                                                                        | $0.0156 \pm 0.0003$ {— <sup>a</sup> }                                                            | — <sup>b</sup>                   | 2+/1+        |
| Cu         | $0.25 \pm 0.05$                                         | $80 \pm 10$ { $12.9 \pm 0.2$ }                                                                          | $0.16 \pm 0.01$ {— <sup>a</sup> }                                                                | $136^1$                          | 2+/1+        |
| Co-Cyclam  | — <sup>a</sup>                                          | — <sup>a</sup> {— <sup>a</sup> }                                                                        | $0.0175 \pm 0.0002$ {— <sup>a</sup> }                                                            | $61^c$                           | 3+/2+        |
| Ni-Cyclam  | — <sup>a</sup>                                          | — <sup>a</sup> {— <sup>a</sup> }                                                                        | — <sup>a</sup> {— <sup>a</sup> }                                                                 | $-275^c$                         | 2+/1+        |
| Cu-Cyclam  | $0.053 \pm 0.004$                                       | — <sup>a</sup> {— <sup>a</sup> }                                                                        | — <sup>a</sup> {— <sup>a</sup> }                                                                 | $163^c$                          | 2+/1+        |
| Co-Cyclen  | $0.017 \pm 0.003$                                       | — <sup>a</sup> {— <sup>a</sup> }                                                                        | — <sup>a</sup> { $0.0124 \pm 0.0002$ }                                                           | $-228^c$                         | 3+/2+        |
| Ni-Cyclen  | — <sup>a</sup>                                          | — <sup>a</sup> {— <sup>a</sup> }                                                                        | — <sup>a</sup> {— <sup>a</sup> }                                                                 | $-211^c$                         | 2+/1+        |
| Cu-Cyclen  | $0.014 \pm 0.004$                                       | — <sup>a</sup> {— <sup>a</sup> }                                                                        | — <sup>a</sup> {— <sup>a</sup> }                                                                 | $280^c$                          | 2+/1+        |
| Fe-DOTA    | — <sup>a</sup>                                          | — <sup>a</sup> {— <sup>a</sup> }                                                                        | $0.0601 \pm 0.0005$ {— <sup>a</sup> }                                                            | $396^1$                          | 3+/2+        |
| Co-DOTA    | — <sup>a</sup>                                          | — <sup>a</sup> {— <sup>a</sup> }                                                                        | — <sup>a</sup> {— <sup>a</sup> }                                                                 | $142^1$                          | 3+/2+        |
| Ni-DOTA    | $0.030 \pm 0.007$                                       | — <sup>a</sup> {— <sup>a</sup> }                                                                        | — <sup>a</sup> {— <sup>a</sup> }                                                                 | $-35^1$                          | 2+/1+        |
| Cu-DOTA    | — <sup>a</sup>                                          | — <sup>a</sup> {— <sup>a</sup> }                                                                        | — <sup>a</sup> {— <sup>a</sup> }                                                                 | $180^1$                          | 2+/1+        |
| Fe-DTPA    | — <sup>a</sup>                                          | — <sup>a</sup> {— <sup>a</sup> }                                                                        | $0.0185 \pm 0.0005$ {— <sup>a</sup> }                                                            | $280^1$                          | 3+/2+        |
| Co-DTPA    | — <sup>a</sup>                                          | — <sup>a</sup> {— <sup>a</sup> }                                                                        | — <sup>a</sup> {— <sup>a</sup> }                                                                 | $1111^1$                         | 3+/2+        |
| Ni-DTPA    | — <sup>a</sup>                                          | — <sup>a</sup> {— <sup>a</sup> }                                                                        | — <sup>a</sup> {— <sup>a</sup> }                                                                 | — <sup>b</sup>                   | 2+/1+        |
| Cu-DTPA    | — <sup>a</sup>                                          | — <sup>a</sup> {— <sup>a</sup> }                                                                        | — <sup>a</sup> {— <sup>a</sup> }                                                                 | $148^1$                          | 2+/1+        |
| Fe-EDTA    | $0.044 \pm 0.009$                                       | $80 \pm 10$ { $6.9 \pm 0.2$ }                                                                           | $0.078 \pm 0.001$ { $0.0222 \pm 0.0006$ }                                                        | $391^1$                          | 3+/2+        |
| Co-EDTA    | $0.08 \pm 0.02$                                         | — <sup>a</sup> {— <sup>a</sup> }                                                                        | $0.0185 \pm 0.0003$ {— <sup>a</sup> }                                                            | $146^1$                          | 3+/2+        |
| Ni-EDTA    | $0.037 \pm 0.002$                                       | — <sup>a</sup> {— <sup>a</sup> }                                                                        | — <sup>a</sup> {— <sup>a</sup> }                                                                 | $172^1$                          | 2+/1+        |
| Cu-EDTA    | $0.032 \pm 0.003$                                       | — <sup>a</sup> {— <sup>a</sup> }                                                                        | — <sup>a</sup> {— <sup>a</sup> }                                                                 | $47^1$                           | 2+/1+        |
| Co-GGH     | — <sup>a</sup>                                          | $0.5 \pm 0.2$ { $4.9 \pm 0.1$ }                                                                         | — <sup>a</sup> {— <sup>a</sup> }                                                                 | $-119^1$                         | 3+/2+        |
| Ni-GGH     | — <sup>a</sup>                                          | — <sup>a</sup> {— <sup>a</sup> }                                                                        | — <sup>a</sup> {— <sup>a</sup> }                                                                 | $1000^1$                         | 3+/2+        |
| Cu-GGH     | $0.06 \pm 0.01$                                         | $2.72 \pm 0.08$ {— <sup>a</sup> }                                                                       | — <sup>a</sup> {— <sup>a</sup> }                                                                 | $1038^1$                         | 3+/2+        |
| Co-KGHK    | $0.014 \pm 0.002$                                       | $0.5 \pm 0.2$ { $7.1 \pm 0.2$ }                                                                         | — <sup>a</sup> {— <sup>a</sup> }                                                                 | $-228^1$                         | 3+/2+        |
| Ni-KGHK    | — <sup>a</sup>                                          | — <sup>a</sup> {— <sup>a</sup> }                                                                        | — <sup>a</sup> {— <sup>a</sup> }                                                                 | $1055^1$                         | 3+/2+        |
| Cu-KGHK    | $0.055 \pm 0.008$                                       | — <sup>a</sup> {— <sup>a</sup> }                                                                        | — <sup>a</sup> {— <sup>a</sup> }                                                                 | $1058^1$                         | 3+/2+        |
| Fe-NTA     | $0.05 \pm 0.01$                                         | $130 \pm 20$ { $4.15 \pm 0.04$ }                                                                        | $0.145 \pm 0.002$ { $0.0449 \pm 0.0005$ }                                                        | $464^1$                          | 3+/2+        |
| Co-NTA     | $0.1 \pm 0.1$                                           | — <sup>a</sup> {— <sup>a</sup> }                                                                        | $0.075 \pm 0.002$ {— <sup>a</sup> }                                                              | $274^1$                          | 3+/2+        |
| Ni-NTA     | — <sup>a</sup>                                          | — <sup>a</sup> {— <sup>a</sup> }                                                                        | — <sup>a</sup> {— <sup>a</sup> }                                                                 | $176^1$                          | 2+/1+        |
| Cu-NTA     | $0.148 \pm 0.007$                                       | $0.72 \pm 0.05$ { $3.46 \pm 0.04$ }                                                                     | — <sup>a</sup> {— <sup>a</sup> }                                                                 | $215^1$                          | 2+/1+        |
| Fe-TACN    | $0.012 \pm 0.006$                                       | $17 \pm 1$ { $5.7 \pm 0.1$ }                                                                            | $25.94 \pm 0.02$ { $0.0099 \pm 0.0001$ }                                                         | $175^c$                          | 3+/2+        |
| Co-TACN    | — <sup>a</sup>                                          | — <sup>a</sup> {— <sup>a</sup> }                                                                        | — <sup>a</sup> {— <sup>a</sup> }                                                                 | $-362^c$                         | 3+/2+        |
| Ni-TACN    | — <sup>a</sup>                                          | — <sup>a</sup> {— <sup>a</sup> }                                                                        | — <sup>a</sup> {— <sup>a</sup> }                                                                 | $991^c$                          | 2+/1+        |
| Cu-TACN    | — <sup>a</sup>                                          | — <sup>a</sup> {— <sup>a</sup> }                                                                        | — <sup>a</sup> {— <sup>a</sup> }                                                                 | $110^c$                          | 2+/1+        |
| Background | $0.006 \pm 0.001$                                       | $0.6 \pm 0.6$ { $0.3 \pm 0.1$ }                                                                         | $0.007 \pm 0.003$ { $0.0039 \pm 0.0007$ }                                                        |                                  |              |

**Table SM2.** Summary of observed rate constants for DNA nicking reactions ( $k_{\text{nick}}$ ) promoted by M-chelates/ $\text{H}_2\text{O}_2$ /ascorbate, arranged by chelating ligand. Initial rates for ascorbate consumption (with and without  $\text{H}_2\text{O}_2$  as an added coreactant) and radical generation (again, with and without added  $\text{H}_2\text{O}_2$ ), as well as the reduction potential for each M-chelate, are listed for comparison. Redox couples are 3+/2+ for Fe, Co, Ni-ATCUN, and Cu-ATCUN complexes and 2+/1+ for all other Ni and Cu complexes. <sup>a</sup> Below detection limit. <sup>b</sup> Not determined. <sup>c</sup> This work.

## **SM References**

- (1) Joyner, J. C.; Cowan, J. A. *J. Am. Chem. Soc.* **2011**, *133*, 9912–9922.
- (2) Samuni, A.; Goldstein, S.; Russo, A.; Mitchell, J. B.; Krishna, M. C.; Neta, P. *J. Am. Chem. Soc.* **2002**, *124*, 8719-8724.
- (3) Bar-On, P.; Mohsen, M.; Zhang, R.; Feigin, E.; Chevion, M.; Samuni, A. *J. Am. Chem. Soc.* **1999**, *121*, 8070-8073.
- (4) Mishra, K. P.; Gogate, P. R. *Separ. Purif. Technol.* **2010**, *75*, 385-391.
- (5) Laight, D. W.; Andrews, T. J.; Haj-Yehia, A. I.; Carrier, M. J.; Änggård, E. E. *Env. Tox. Pharm.* **1997**, *3*, 65-68.

## **Complete Reference 8 from Manuscript**

Hacein-Bey-Abina, S.; Kalle, C. V. S., M.; M.P., M.; Wulffraat, N.; Leboulch, P.; Lim, A.; Osborne, C. S.; Pawliuk, R.; Morillon, E.; Sorenson, R.; Forster, A.; Fraser, P.; Cohen, J. I.; de Saint Basile, G.; Alexander, I.; Wintergest, U.; Frebourg, T.; Aurias, A.; Stoppa-Lyonnet, D.; Romana, S.; Radford-Weiss, I.; Gross, F.; Valensi, F.; Delabesse, E.; Macintyre, E.; Sigaux, F.; Soulier, J.; Leiva, L. E.; Wissler, M.; Prinz, C.; Rabbitts, T. H.; Le Deist, F.; Fischer, A.; Cavazzana-Calvo, M. *Science* **2003**, *302*, 415.
